# Supplementary material for: C-Glycosylation in platinum-based agents: a viable strategy to improve cytotoxicity and selectivity
Source: Royal Society of Chemistry journal article supplement (doi:10.1039/c8qi00664d), 2018-01-01
Supplement: c8qi00664d1.pdf [file c8qi00664d1.pdf]

## Supporting Information

### C-glycosylation in Platinum-Based Agents: a Viable Strategy to Improve Cytotoxicity and Selectivity

Maria Elena Cucciolito,<sup>a,b</sup> Ferdinando De Luca Bossa,<sup>a</sup> Roberto Esposito,<sup>a,b</sup> Giarita Ferraro,<sup>a</sup> Alfonso Iadonisi,<sup>a,b</sup> Ganna Petruk,<sup>a</sup> Luigi D'Elia,<sup>a</sup> Claudia Romanetti,<sup>a</sup> Serena Traboni,<sup>a</sup> Angela Tuzi,<sup>a</sup> Daria Maria Monti,<sup>a</sup> Antonello Merlino\*<sup>a</sup> and Francesco Ruffo\*<sup>a,b</sup>

- 
- a Dipartimento di Scienze Chimiche  
Università di Napoli Federico II  
Complesso Universitario di Monte S. Angelo, via Cintia 21 – 80126 Napoli
- b Consorzio Interuniversitario di Reattività Chimica e Catalisi  
via Celso Ulpiani 27 - 70126 Bari, Italy

**Figure S1.** <sup>1</sup>H and <sup>13</sup>C NMR spectra of **1gal<sub>6</sub>-I** (in CDCl<sub>3</sub>, 400 MHz, 298 K).

**Figure S2.** <sup>1</sup>H and <sup>13</sup>C NMR spectra of **1gal<sub>6</sub>-Br** (in CDCl<sub>3</sub>, 400 MHz, 298 K).

**Figure S3.** <sup>1</sup>H and <sup>13</sup>C NMR spectra of **1gal<sub>6</sub>-Cl** (in CDCl<sub>3</sub>, 400 MHz, 298 K).

**Figure S4.** <sup>1</sup>H and <sup>13</sup>C NMR spectra of **1gal<sub>1</sub>-I** (in CDCl<sub>3</sub>, 400 MHz, 298 K).

**Figure S5.** <sup>1</sup>H and <sup>13</sup>C NMR spectra of **1gal<sub>1</sub>-Br** (in CDCl<sub>3</sub>, 400 MHz, 298 K).

**Figure S6.** <sup>1</sup>H and <sup>13</sup>C NMR spectra of **1gal<sub>1</sub>-Cl** (in CDCl<sub>3</sub>, 400 MHz, 298 K).

**Figure S7.** <sup>1</sup>H and <sup>13</sup>C NMR spectra of **1gal<sub>1</sub>-Idep** (in acetone-d<sub>6</sub>, 400 MHz, 298 K).

**Figure S8.** <sup>1</sup>H and <sup>13</sup>C NMR spectra of **1glu<sub>1</sub>-I** (in CDCl<sub>3</sub>, 400 MHz, 298 K).

**Figure S9.** <sup>1</sup>H and <sup>13</sup>C NMR spectra of **1glu<sub>1</sub>-Br** (in CDCl<sub>3</sub>, 400 MHz, 298 K).

**Figure S10.** <sup>1</sup>H and <sup>13</sup>C NMR spectra of **1glu<sub>1</sub>-Cl** (in CDCl<sub>3</sub>, 400 MHz, 298 K).

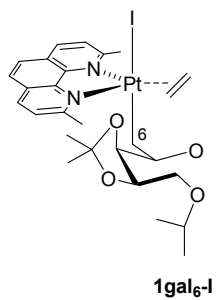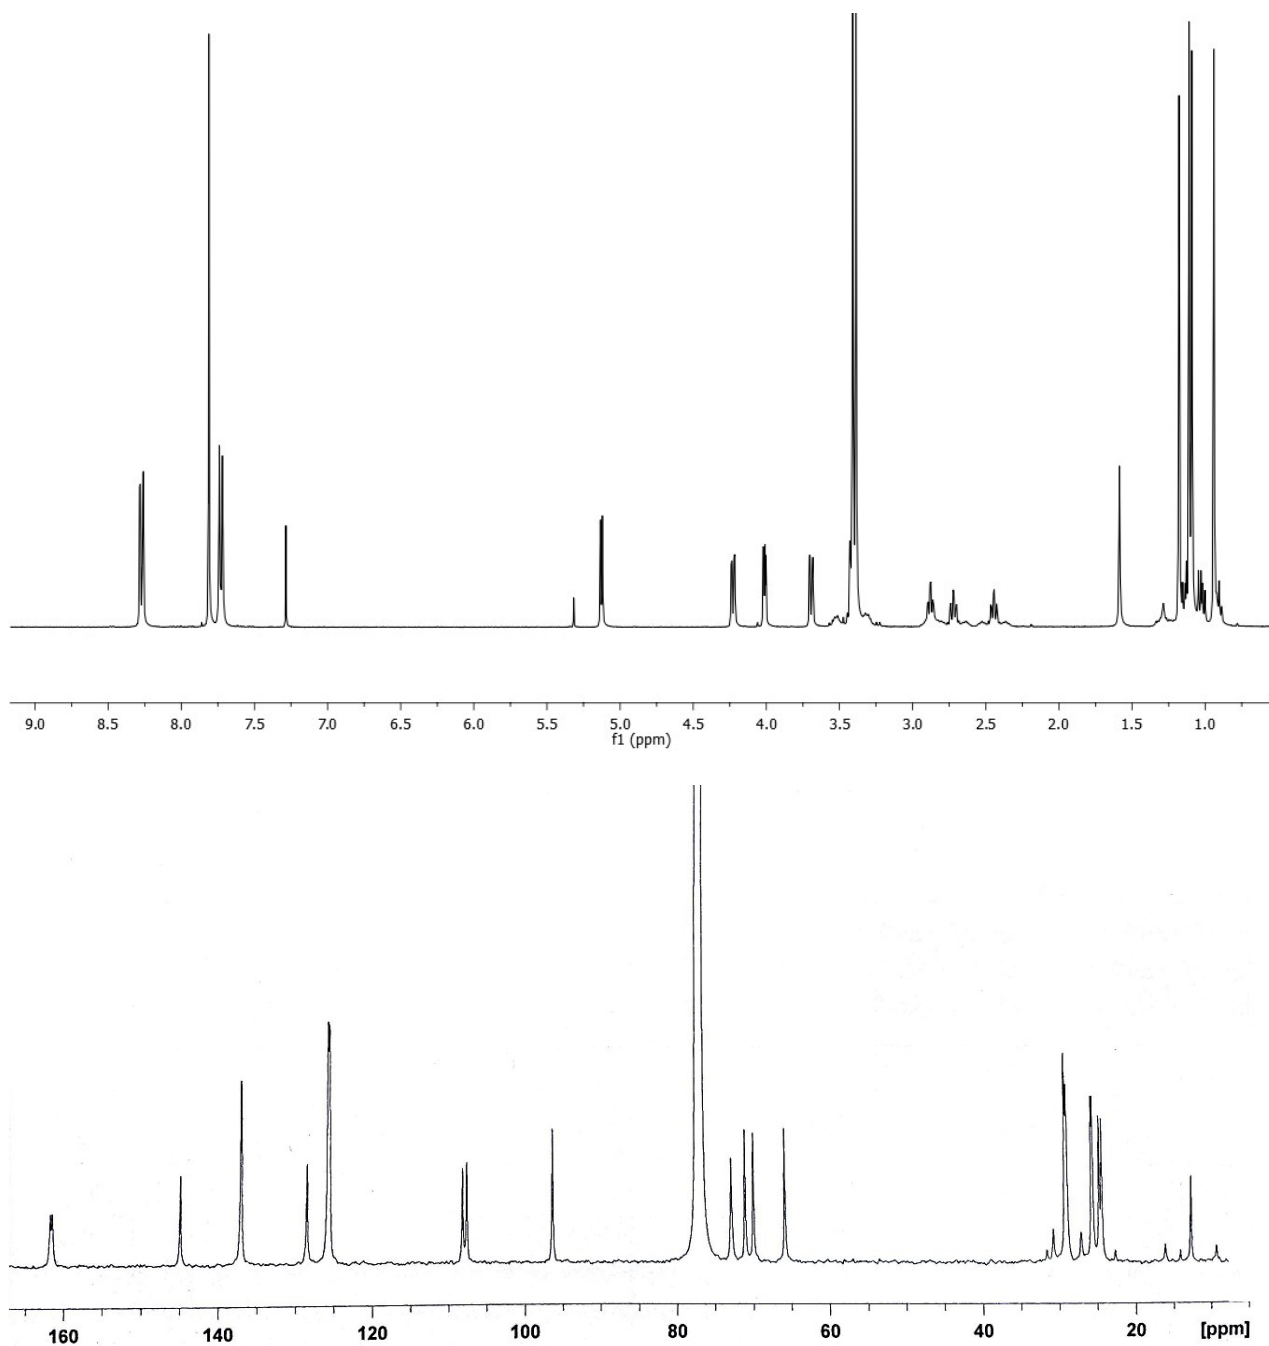

**Figure S1.** <sup>1</sup>H and <sup>13</sup>C NMR spectra of **1gal<sub>6</sub>-I** (in CDCl<sub>3</sub>, 400 MHz, 298 K).

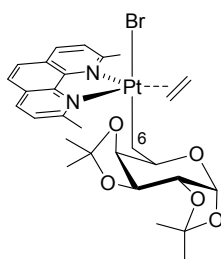

**1gal<sub>6</sub>-Br**

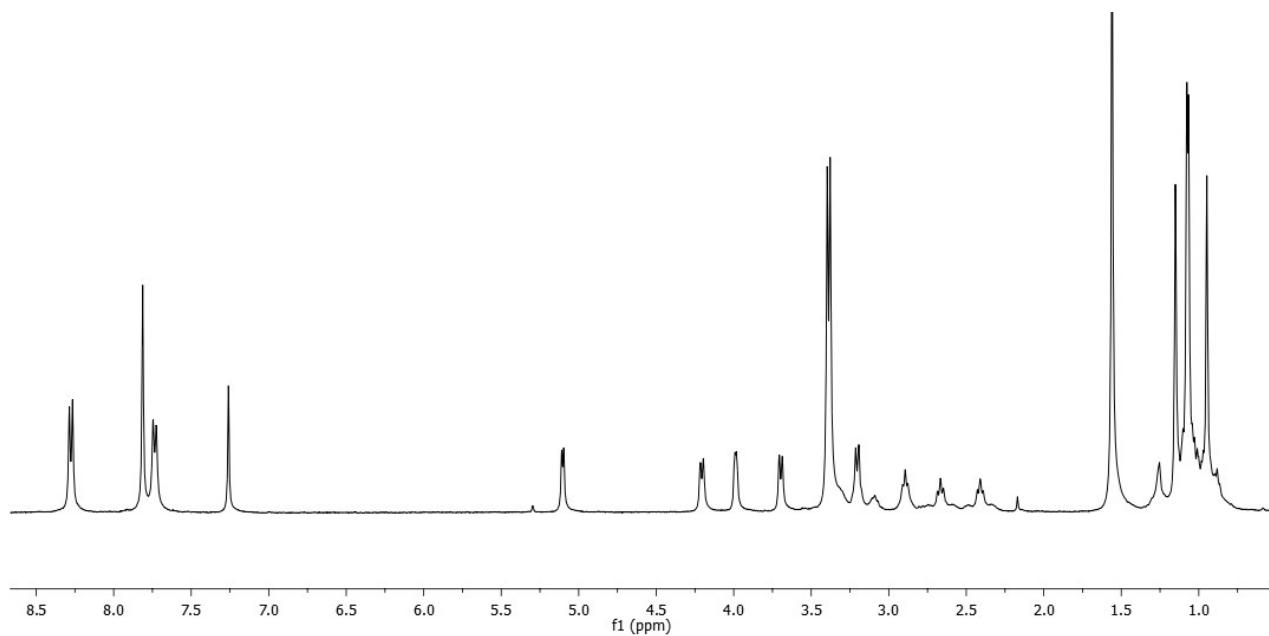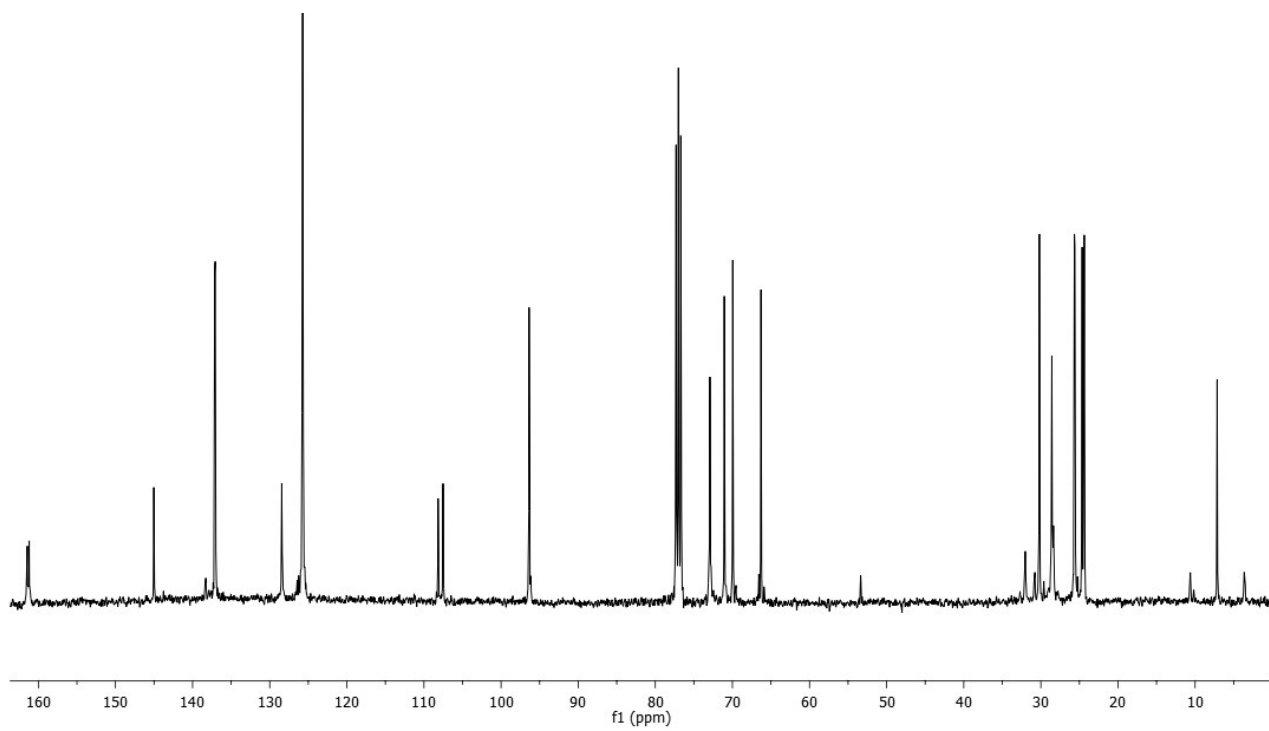

**Figure S2.** <sup>1</sup>H and <sup>13</sup>C NMR spectra of **1gal<sub>6</sub>-Br** (in CDCl<sub>3</sub>, 400 MHz, 298 K).

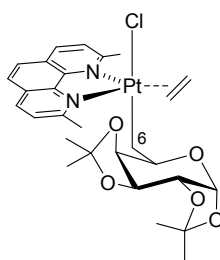

**1gal<sub>6</sub>-Cl**

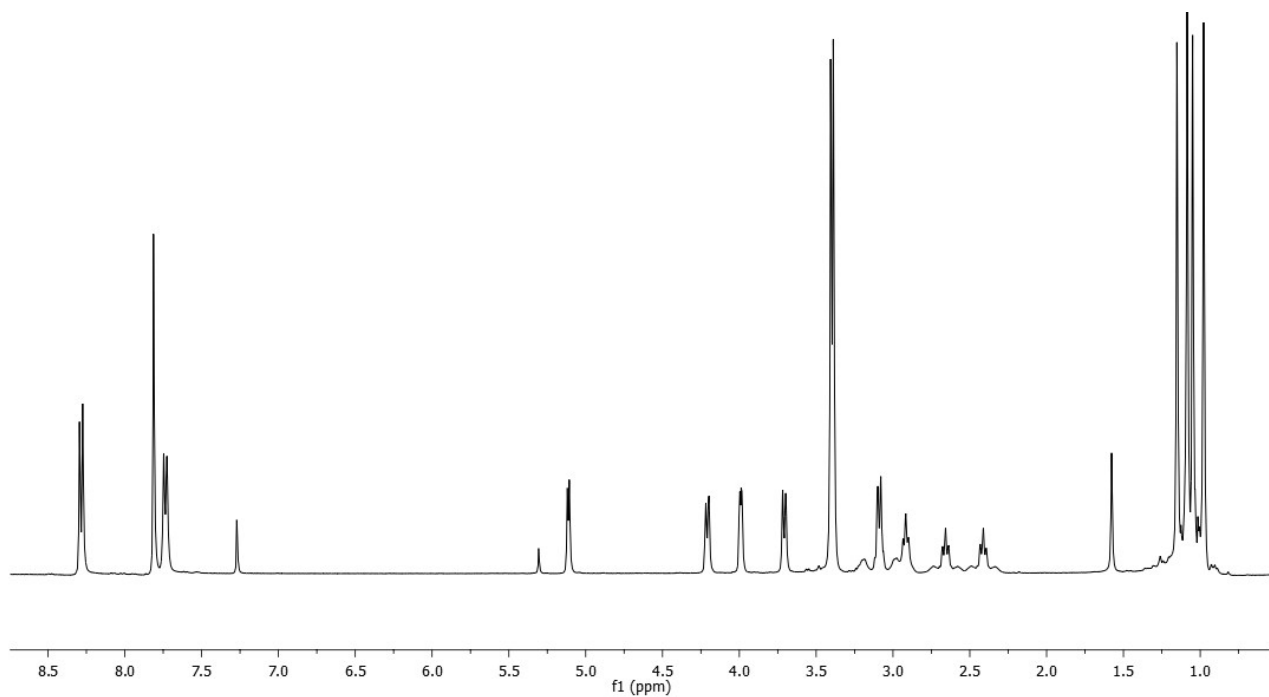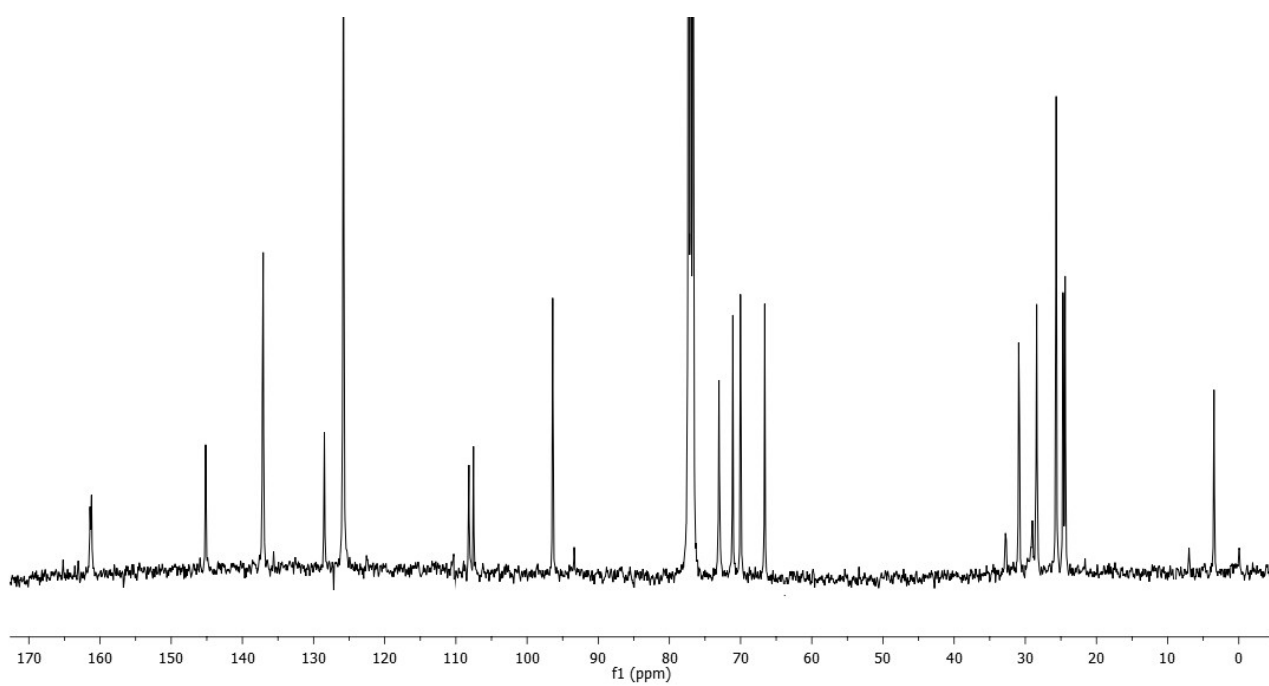

**Figure S3.** <sup>1</sup>H and <sup>13</sup>C NMR spectra of **1gal<sub>6</sub>-Cl** (in CDCl<sub>3</sub>, 400 MHz, 298 K).

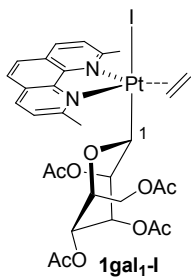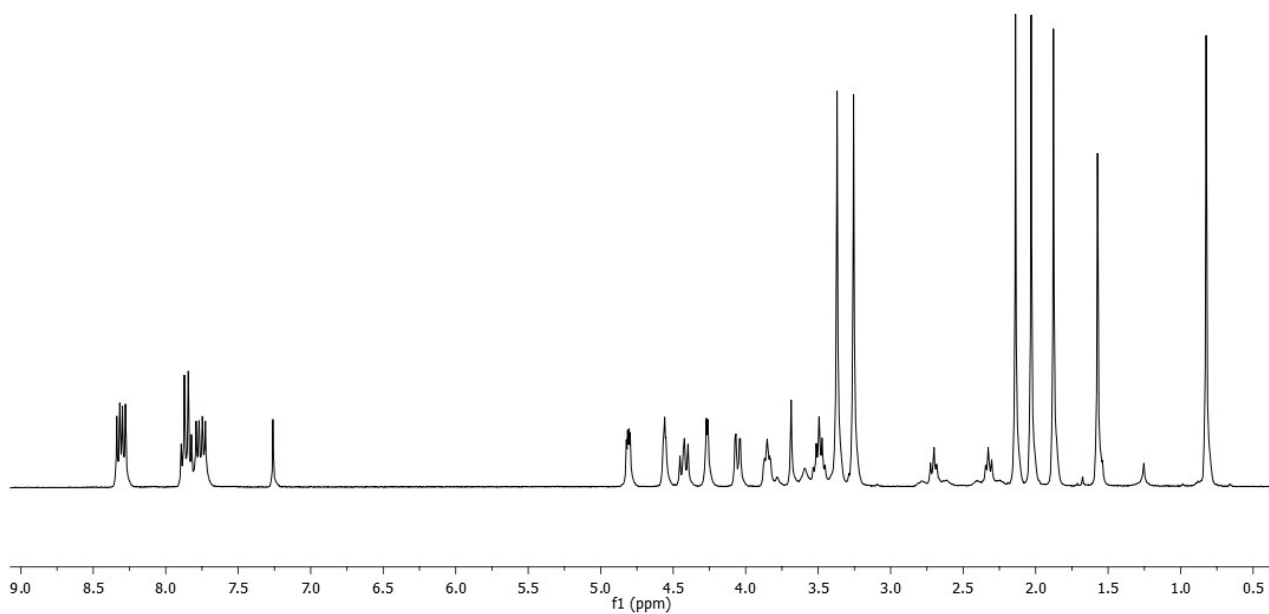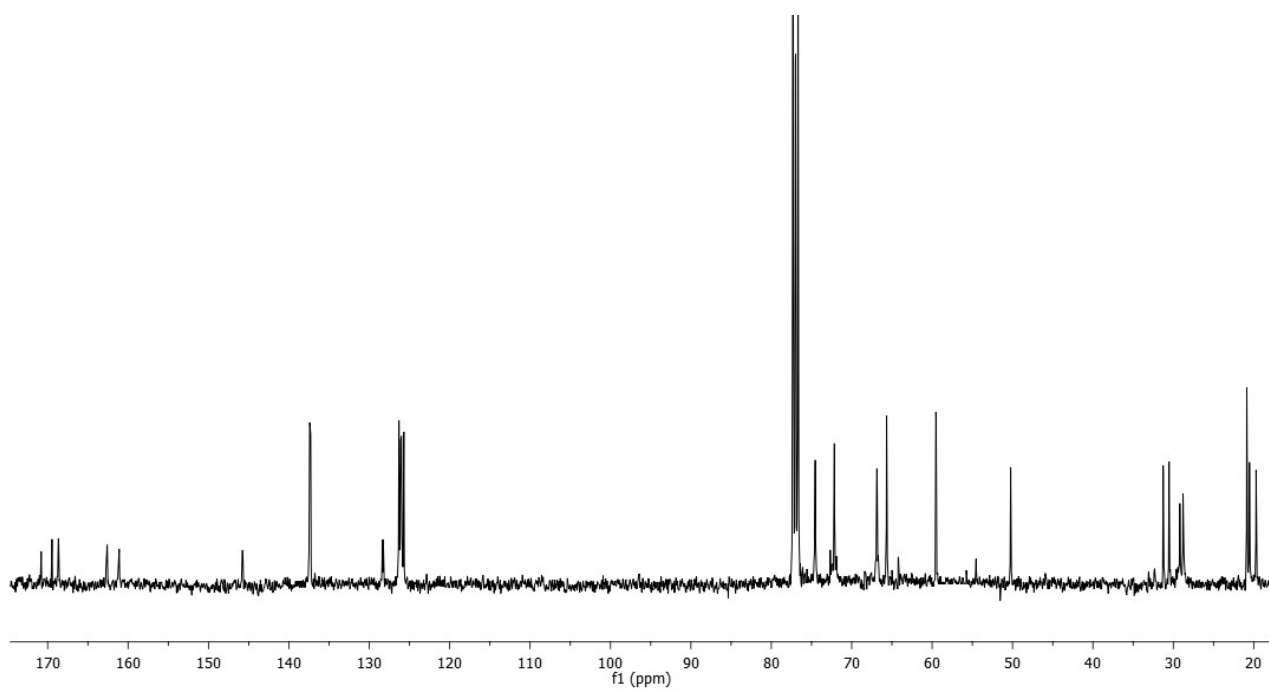

**Figure S4.** <sup>1</sup>H and <sup>13</sup>C NMR spectra of **1gal<sub>1</sub>-I** (in CDCl<sub>3</sub>, 400 MHz, 298 K).

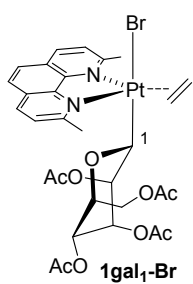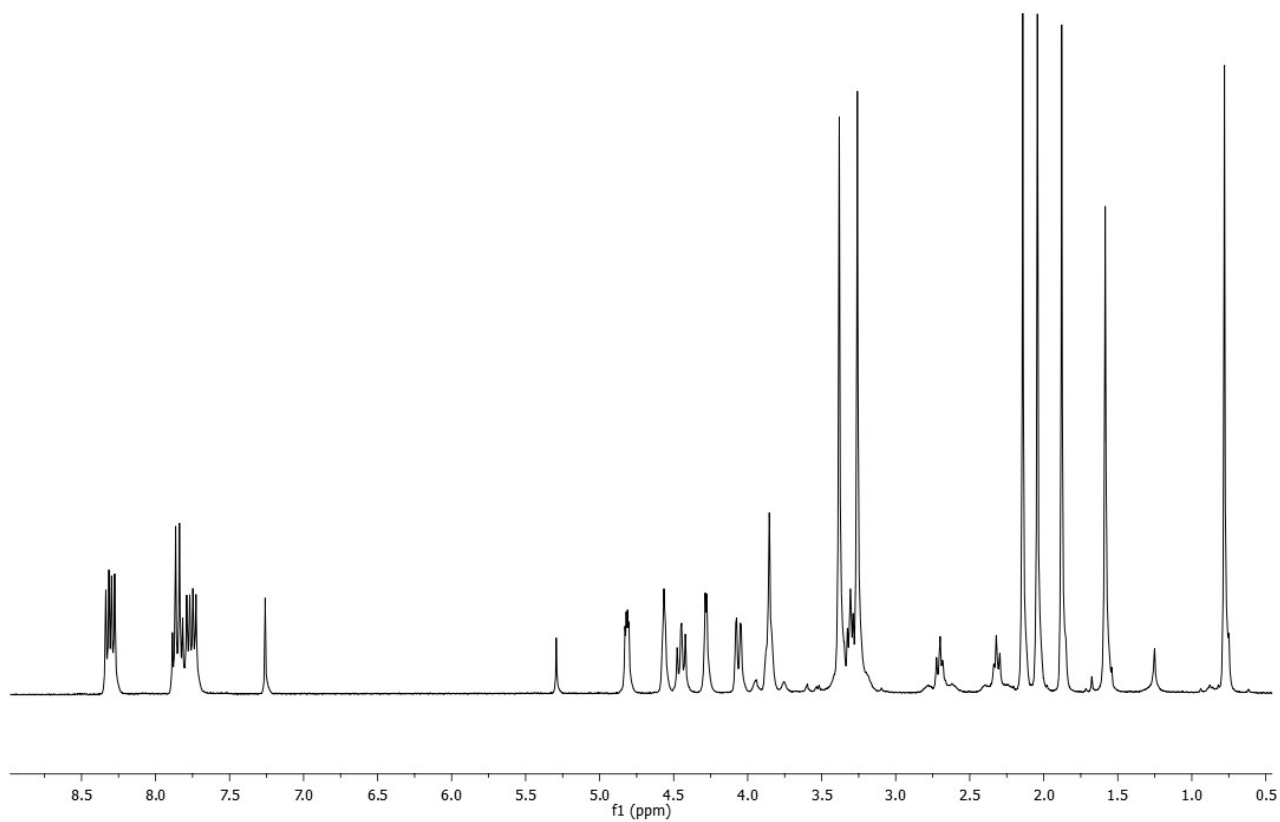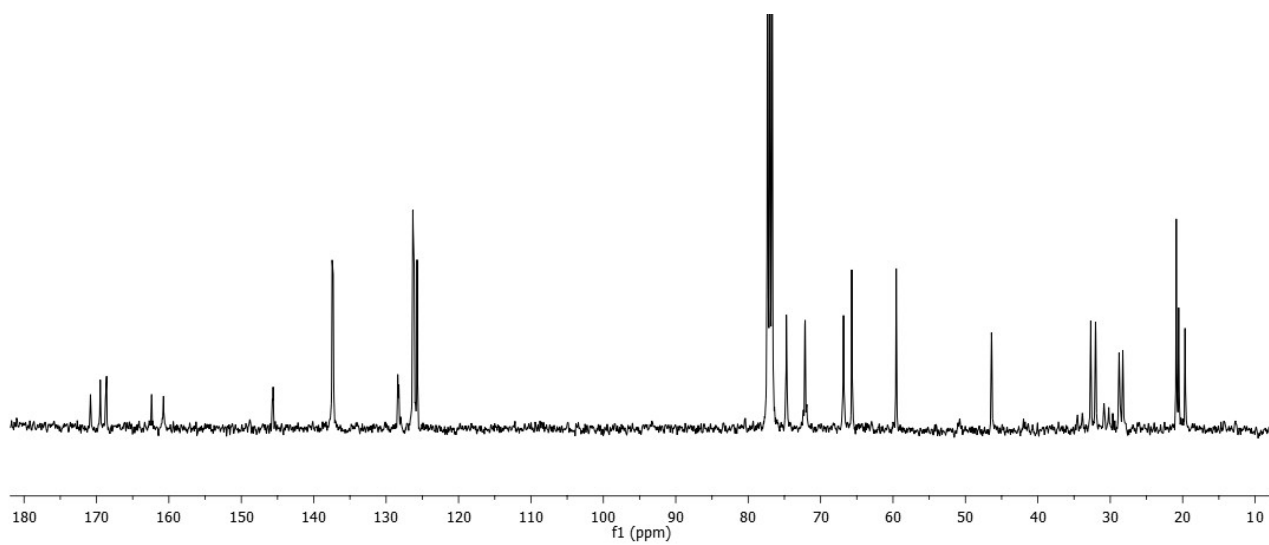

**Figure S5.** <sup>1</sup>H and <sup>13</sup>C NMR spectra of **1gal<sub>1</sub>-Br** (in CDCl<sub>3</sub>, 400 MHz, 298 K).

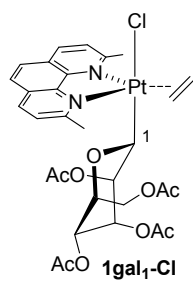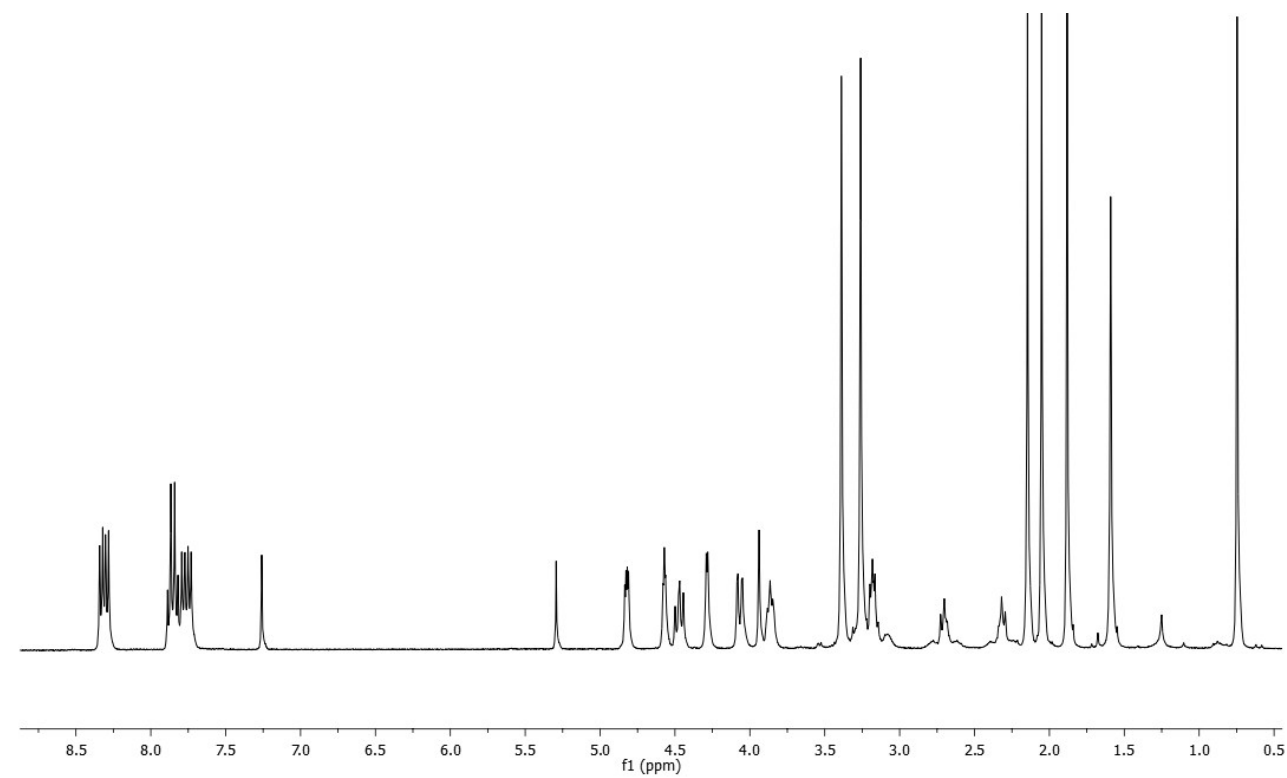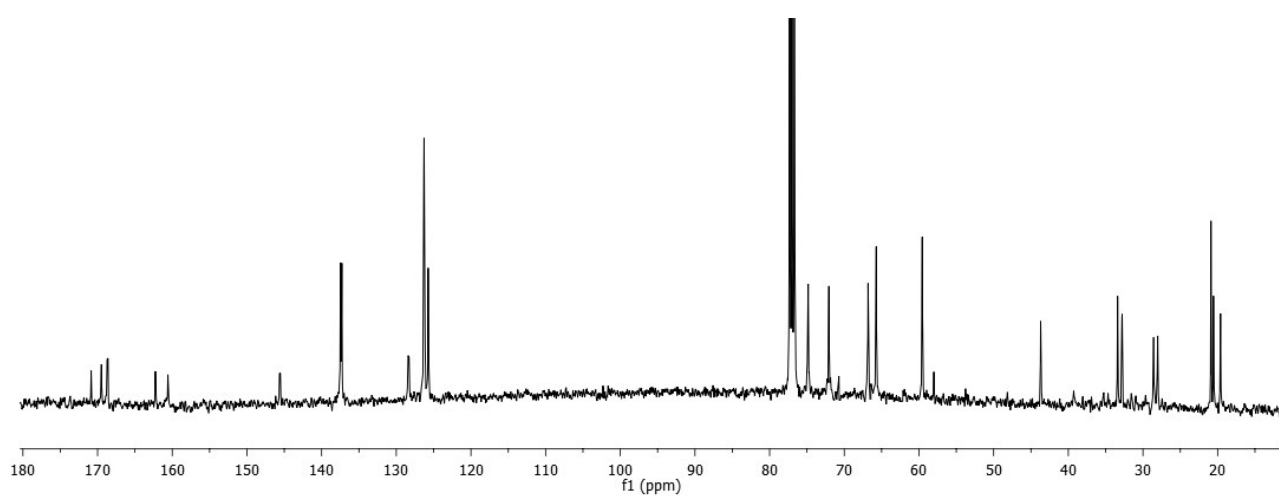

**Figure S6.** <sup>1</sup>H and <sup>13</sup>C NMR spectra of **1gal<sub>1</sub>-Cl** (in CDCl<sub>3</sub>, 400 MHz, 298 K).

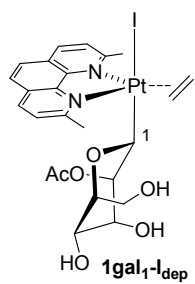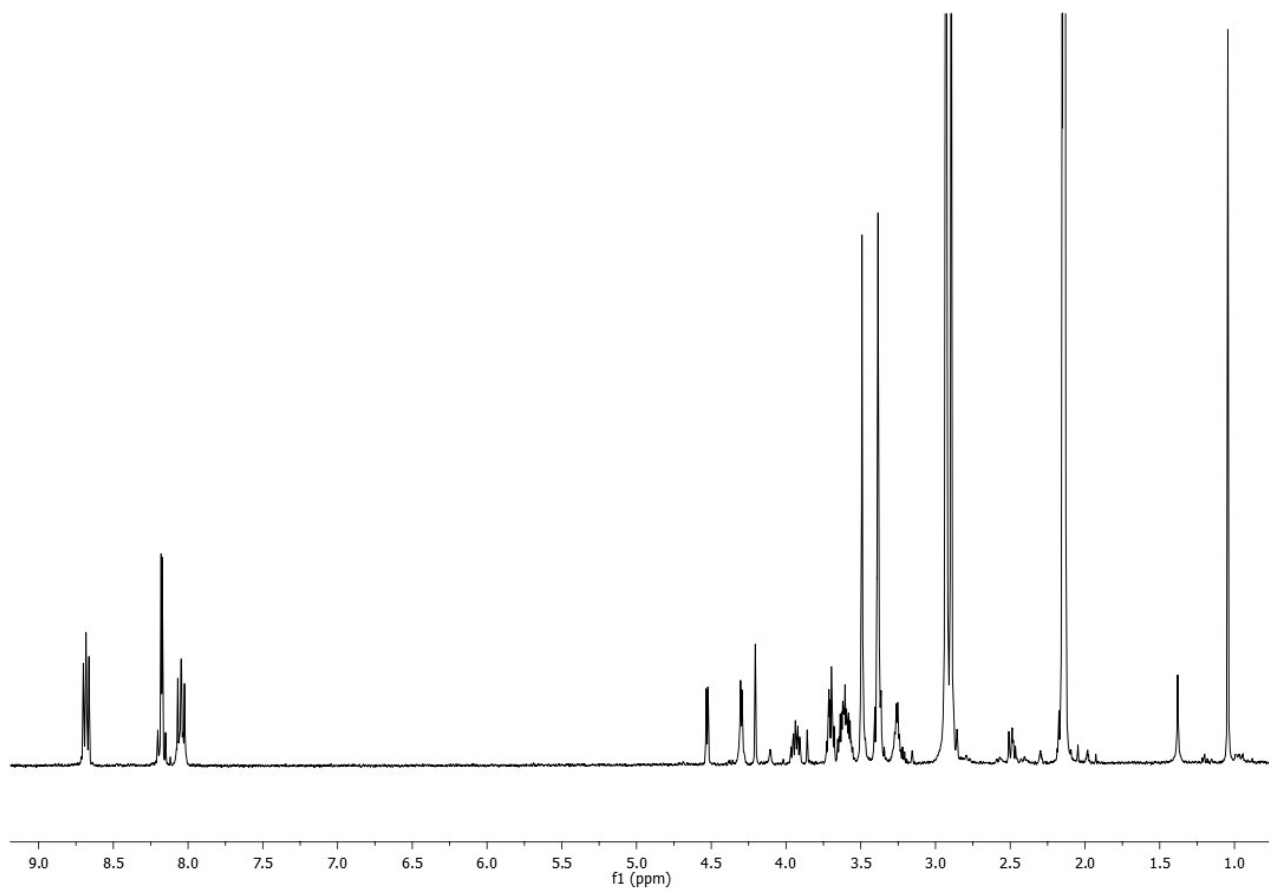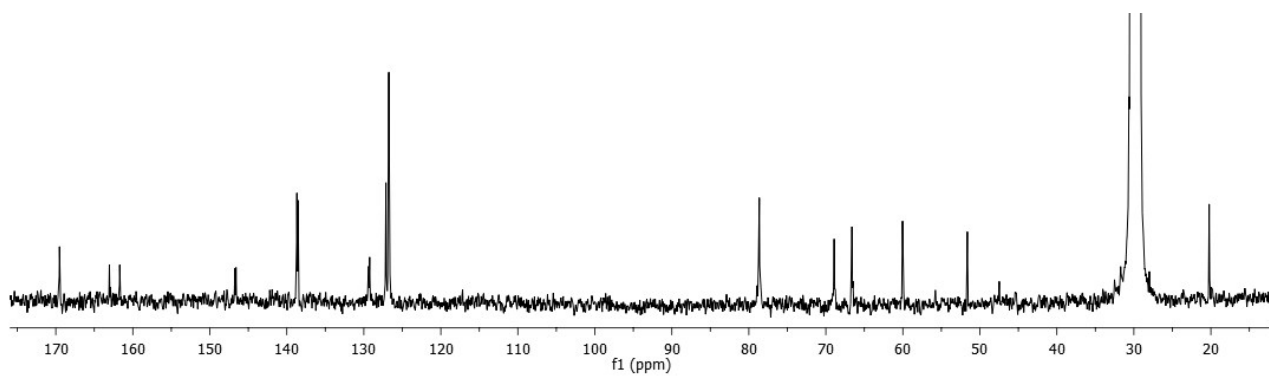

**Figure S7.** <sup>1</sup>H and <sup>13</sup>C NMR spectra of **1gal<sub>1</sub>-Idep** (in acetone-d<sub>6</sub>, 400 MHz, 298 K).



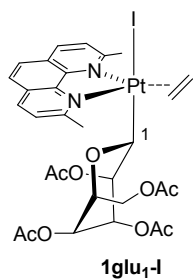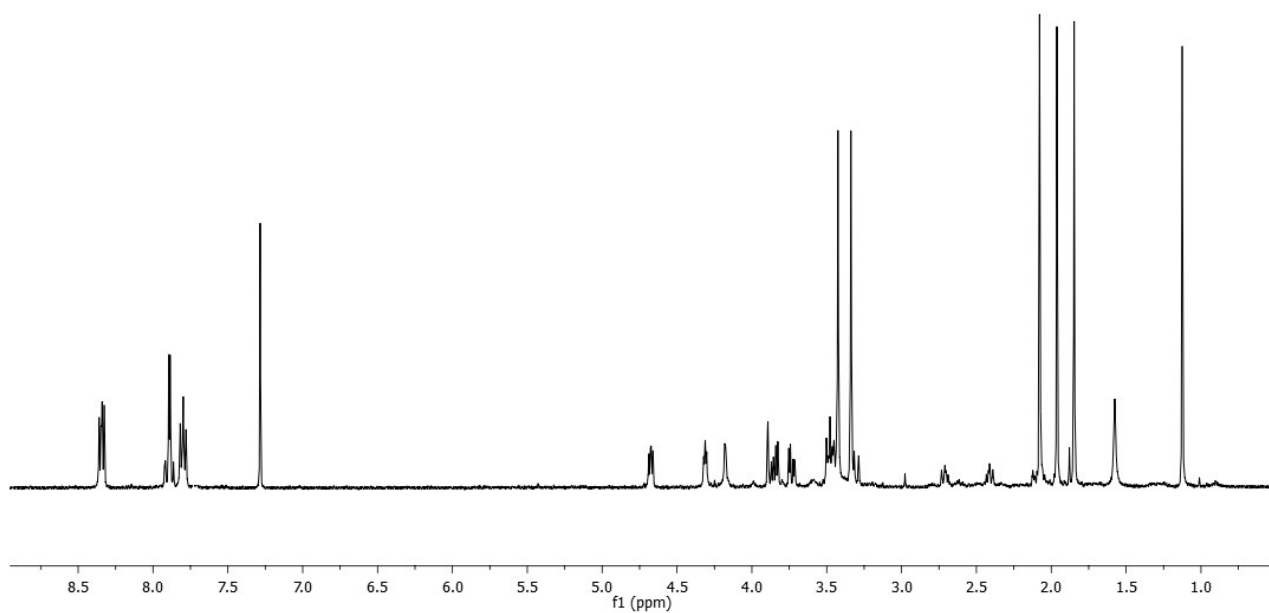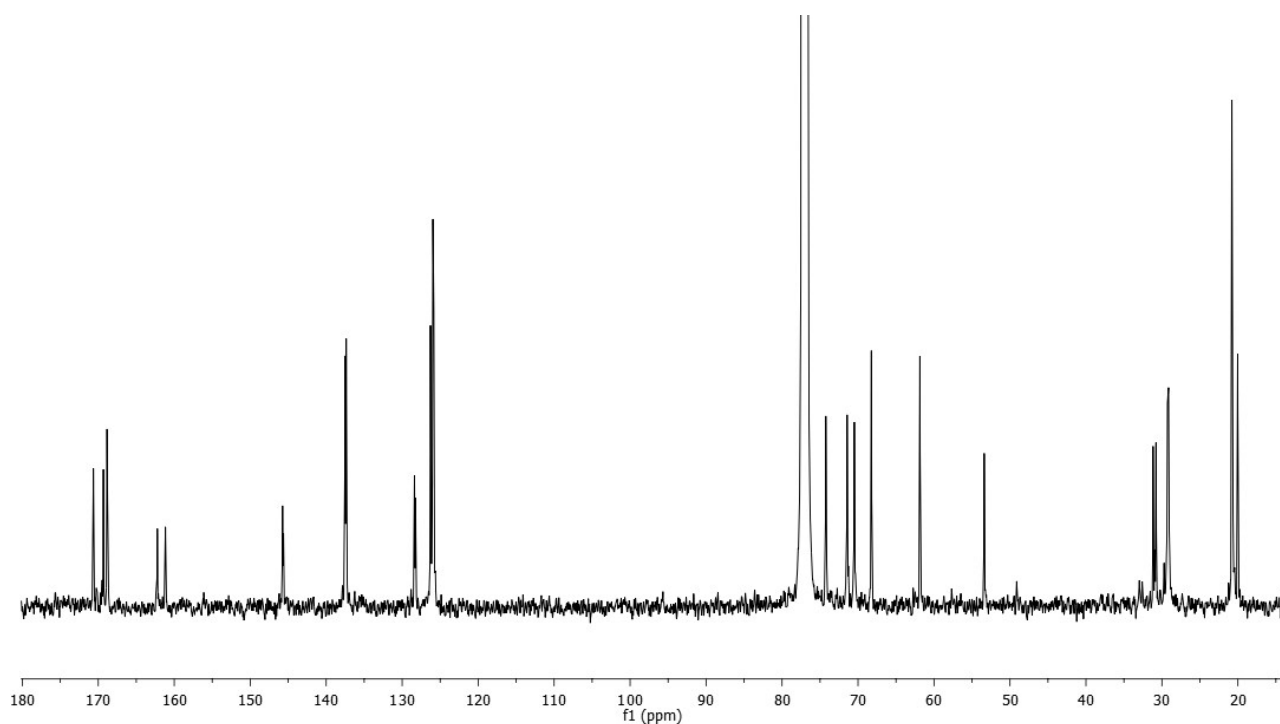

**Figure S8.** <sup>1</sup>H and <sup>13</sup>C NMR spectra of **1glu<sub>1</sub>-I** (in CDCl<sub>3</sub>, 400 MHz, 298 K).

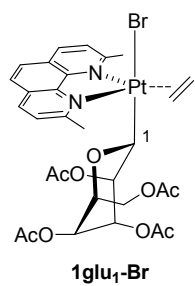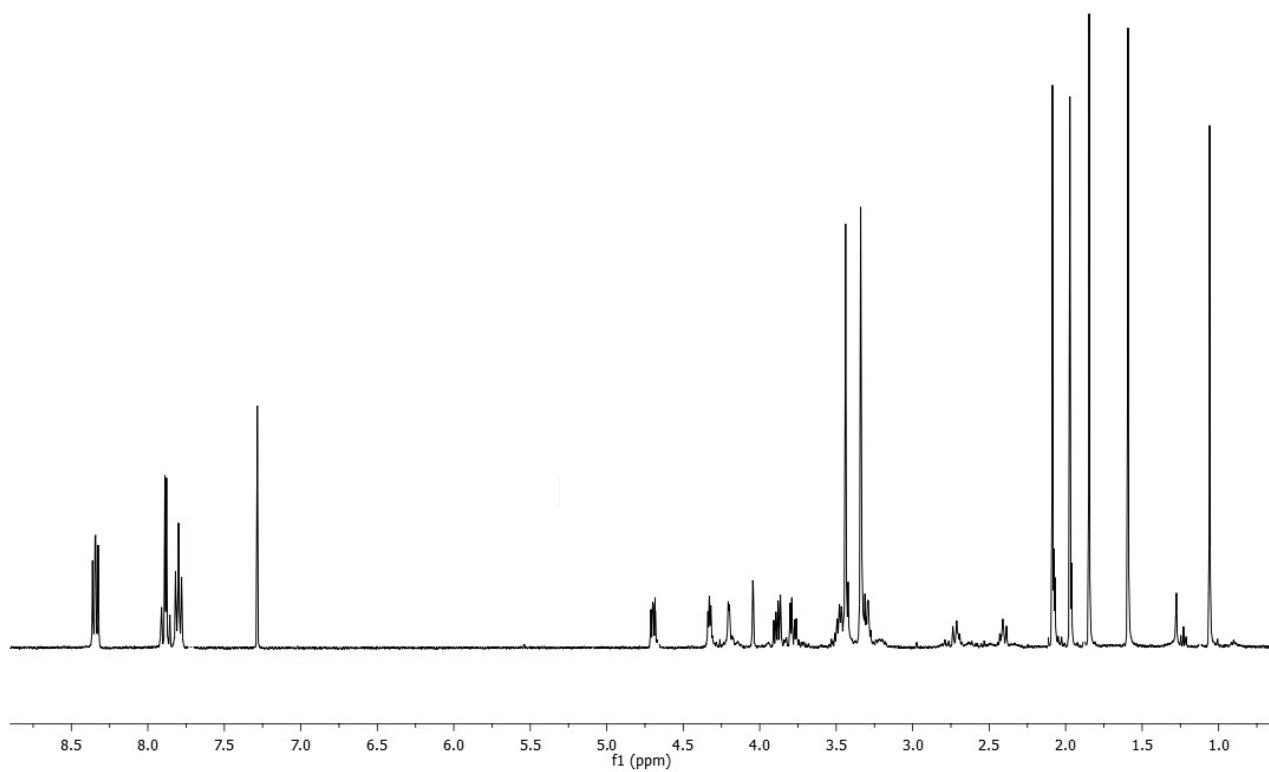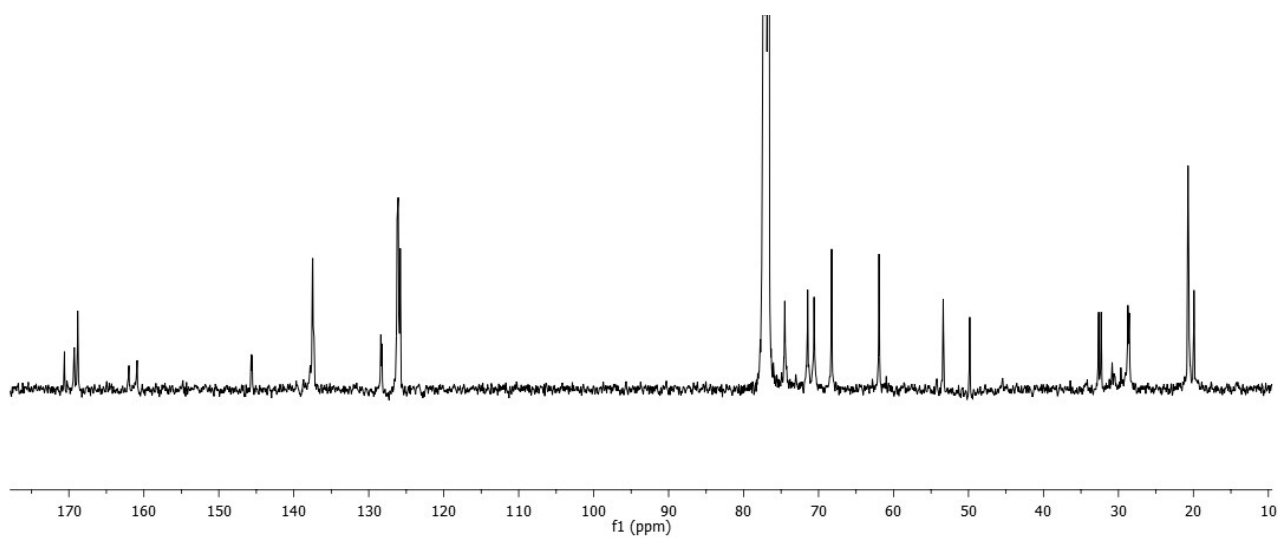

**Figure S9.** <sup>1</sup>H and <sup>13</sup>C NMR spectra of **1glu<sub>1</sub>-Br** (in CDCl<sub>3</sub>, 400 MHz, 298 K).

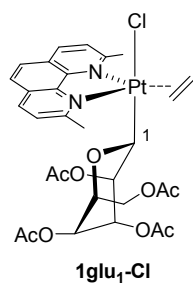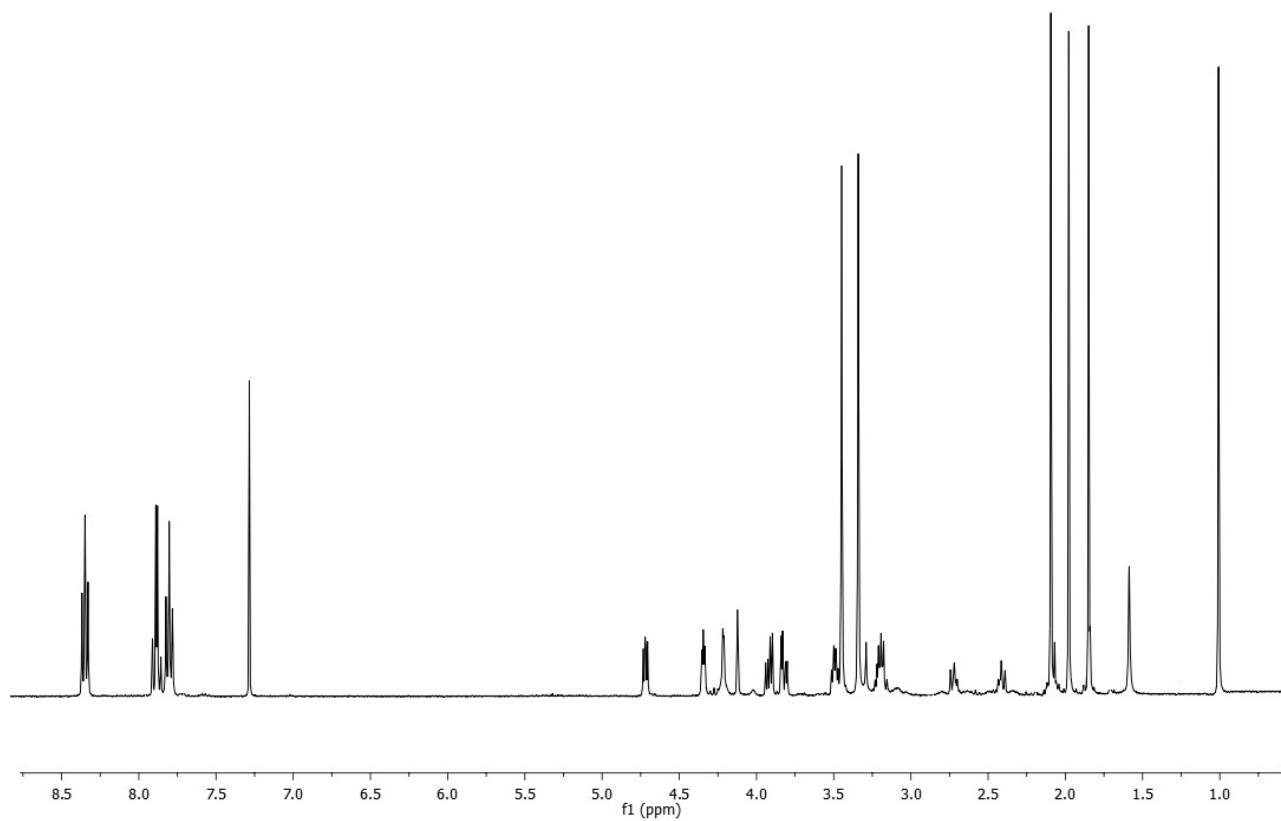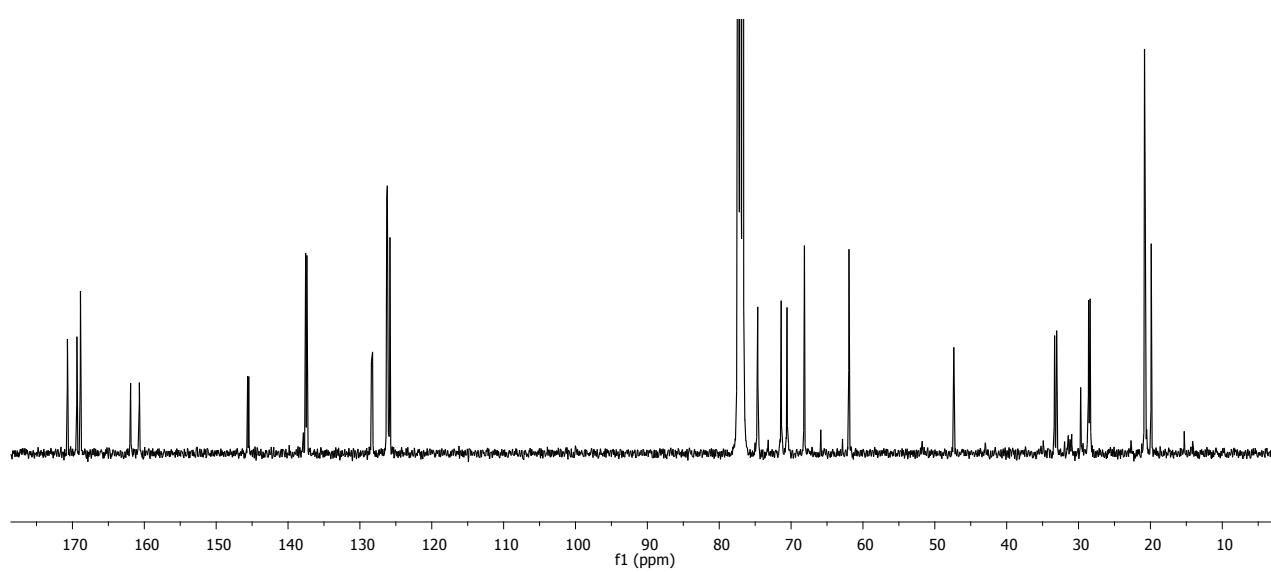

**Figure S10.** <sup>1</sup>H and <sup>13</sup>C NMR spectra of **1glu<sub>1</sub>-Cl** (in CDCl<sub>3</sub>, 400 MHz, 298 K).
